# Supplementary material for: Effect of Hypoxia on Branching Characteristics and Cell Subpopulations during Kidney Organ Culture
Source: MDPI journal article supplement (doi:10.3390/bioengineering9120801), 2022-12-14
Supplement: s1 [file s1]

Article

# Effect of Hypoxia on Branching Characteristics and Cell Subpopulations during Kidney Organ Culture

Morgan Hamon <sup>1,2,\*</sup>, Hsiao-Min Cheng <sup>1,2</sup>, Ming Johnson <sup>1</sup>, Norimoto Yanagawa <sup>1,2</sup>, Peter V. Hauser <sup>1,2,\*</sup>

<sup>1</sup> Medical and Research Services, Greater Los Angeles Veterans Affairs Healthcare System at Sepulveda, North Hills, CA, 91344, USA

<sup>2</sup> Department of Medicine, David Geffen School of Medicine, University of California Los Angeles, Los Angeles, CA, 90095, USA

\* Correspondence: morganhamon@ucla.edu (M.H.); pyhauser@ucla.edu (P.V.H.)

## Supplementary

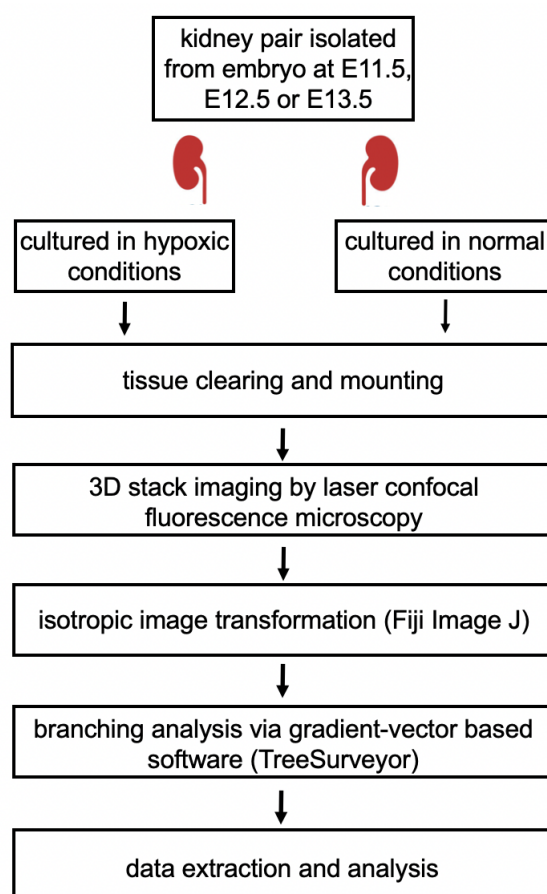

**Figure S1.** Flow Chart Branching Analysis. Flow chart of the experimental procedure for the branching analysis. Kidney pairs were isolated from time pregnancies at E11.5, E12.5 and E13.5. One kidney was cultured under hypoxic and one in regular conditions. After in vitro culture, the kidneys were fixed, cleared and mounted. 3D stack imaging was performed by laser confocal microscopy. Image were transformed into isotropy using Fiji Image J. Subsequent analysis was performed using TreeSurveyor.

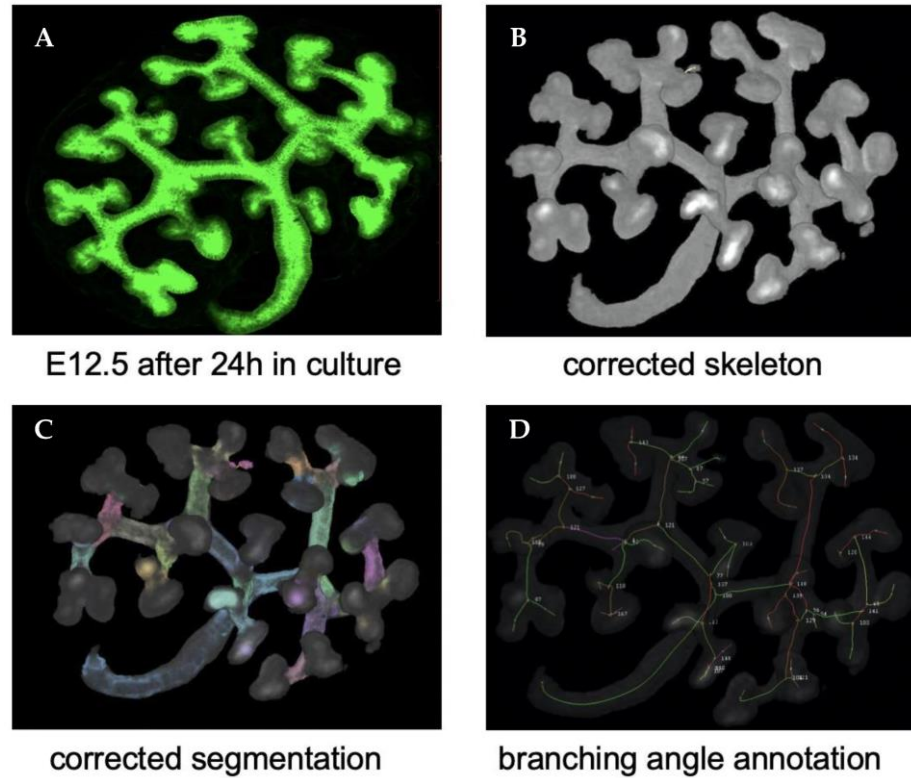

**Figure S2.** Branching Analysis. A Z-stack image of the embryonic kidney is generated by confocal microscopy (A) and the layers are transformed to isotropic images. The transformed isotropic Z-stack is then analyzed using gradient vector-based software (TreeSurveyor) and preliminary hierarchical branched structure is generated [15]. Errors can be edited and a corrected skeleton (B) is used to extract segmentation (C), branching length, branching angle (D) and other parameters from the 3D image.

**Table S1.** Reverse Transcription Primers.

| Target         | Forward                  | Reverse                  |
|----------------|--------------------------|--------------------------|
| $\beta$ -actin | TTGCTGACAGGATGCAGA       | ATCTGCTGGAAGGTGGACAG     |
| AQP 2          | GCCACCTCCTTGGGATCTAT     | TGTAGAGGAGGGAACCGATG     |
| Bmp4           | TGAGAGACCCCAGCCTAAGAC    | CGAATGGCACTACGGAATGG     |
| Cited 1        | TATGTCGAGGCCTGCACTTG     | AAGGTTGGAGTAGGCCAGAG     |
| FoxD1          | TTCGGATTCTTGACCAGAC      | CAAGTCAGGGTTGCAGCATA     |
| GAPDH          | TGAACGGATTTGGCCGTATTG    | ACCATGTAGTTGAGGTCAATGAAG |
| HIF 1 $\alpha$ | CCAGCAGACTCAAATACAAGAACC | TGTATGTGGGTAGGAGATGGAGAT |
| FGF8           | TGGAAGCAGAGTCCGAGTTC     | ATACGCAGTCCTTGCCTTTG     |
| Nkcc2          | GATGCAGAACTGGAAGCAGTC    | GGCTCTGGAGTGTCCTGTAAG    |
| Pdgfra         | AAGACCTGGGCAAGAGGAAC     | GAACCTGTCTCGATGGCACT     |
| Podxl          | TCCTTGTTGCTGCCCTCTAC     | TTCCAAGGTTGGGTTGTCAT     |
| Raldh2         | AGATGCTGACTTGGACTACG     | TCTGAGGACCTGCTCAGTT      |
| Ret            | TTCTGAAGACAGGCCACAGGA    | CACTGGCCTCTTGTCTGGCT     |
| Renin          | CTGGGCACTCTTGTTGCTCT     | GGACCACGGGGGAGATAAA      |
| Snai2          | GCCTCCAAGAAGCCCAACTA     | GCCGACGATGTCCATACAGT     |
| Six 2          | CAAGTCAGCAACTGGTTCAAGA   | ACTGCCATTGAGCGAGGA       |
| Tacstd2        | ACTGTACATGCCCCACCAAC     | GCAGGCACTTGGAAGTTAGC     |
| Tbx18          | GGATATTGTGCCGGTGGACA     | CCGGGAATCAGCATTTCT       |
| Wnt7b          | TACCTAAGTTCCGCGAGGTG     | AGGCTTCTGGTAGCTGCGTA     |
| Wnt 11         | ACATGCGCTGGAAGTCTGCT     | GCATACACGAAGGCTGACTC     |

**Table S2.** Roles of Differentiation Markers. Table recapitulating the embryonic kidney cell subpopulation markers' function.

| Name            | Full name                                                                       | Function                                                                            |
|-----------------|---------------------------------------------------------------------------------|-------------------------------------------------------------------------------------|
| HIF1- $\alpha$  | Hypoxia-inducible factor alpha                                                  | Oxygen-sensitive transcription factor                                               |
| Cited1          | Cbp/P300 Interacting Transactivator with Glu/Asp Rich Carboxy-Terminal Domain 1 | Self-renewal of nephronic progenitor cells of the embryonic <i>kidney</i>           |
| Six2            | Sine Oculis Homeobox Homolog 2                                                  | Self-renewal of nephronic progenitor cells of the embryonic <i>kidney</i>           |
| FGF8            | Fibroblast Growth Factor 8                                                      | Coordination of the behavior of nephron progenitor cells during kidney development. |
| Podx1           | Podocalyxin-like protein 1                                                      | Component of glomerular podocytes                                                   |
| Nkcc2           | Na-K-Cl cotransporter                                                           | Aid in the secondary active transport of sodium, potassium, and chloride into cells |
| c-Ret           | rearranged during transfection                                                  | Receptor tyrosine kinase                                                            |
| Wnt11           | Wnt Family Member 11                                                            | Maintenance nephron progenitor niche integrity                                      |
| Wnt7b           | Wnt Family Member 7b                                                            | Development of the medullary component of the mouse kidney                          |
| Tacstd2         | Tumor-Associated Calcium Signal Transducer 2                                    | Unresolved physiological function                                                   |
| AQP2            | Aquaporin 2                                                                     | Reabsorb water from the urine                                                       |
| Foxd1           | Forkhead Box D1                                                                 | Promotion of nephron progenitor differentiation                                     |
| Raldh2          | retinaldehyde dehydrogenase 2                                                   | Catalyzation of the synthesis of retinoic acid (RA) from retinaldehyde              |
| Snai2           | Snail Family Transcriptional Repressor 2                                        | Zinc finger transcription factor                                                    |
| BMP4            | Bone morphogenetic protein 4                                                    | Transforming growth factor                                                          |
| Tbx18           | T-Box Transcription Factor 18                                                   | Regulation of the development of the ureteral mesenchyme                            |
| Renin           |                                                                                 | Regulation of the body's mean arterial blood pressure                               |
| Pdgfr- $\alpha$ | Platelet-derived growth factor receptor-alpha                                   | Cellular growth and differentiation                                                 |

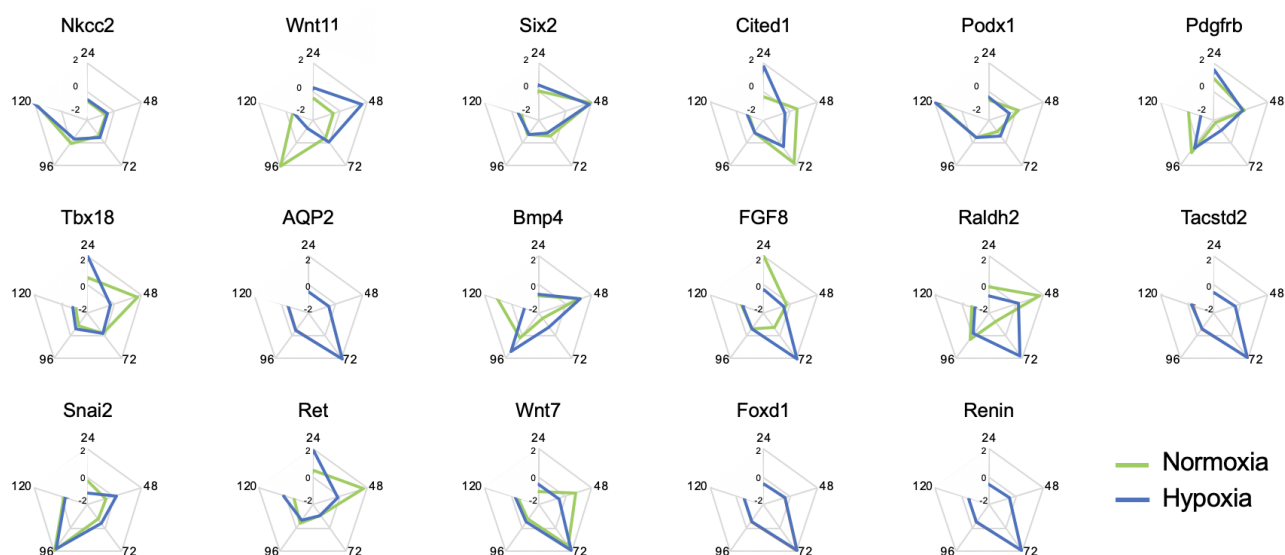

**Figure S3.** Shift in Gene Expression. Visualization of the shift in developmental and the differentiation marker gene expression via spider plots. Corners of the open pentagram represent a timepoint (24h, 48h, 72h, 96h and 120h). Normal gene expression levels are shown by a green line, a blue line shows the gene expression under hypoxic conditions.
